# Supplementary material
Source: PubMed Central journal article supplement (PMC10006796)
Supplement: ajtr0015-0949-f8.pdf [file ajtr0015-0949-f8.pdf]

# LncRNA TEX41 regulates autophagy in LUAD

## Overexpression of TEX41 promoted malignant biological behavior of LUAD cells

In contrast to the results of the TEX41 interference assay, the results of the cell function assay showed that overexpression of TEX41 promoted the growth, proliferation, migration, and invasion of LUAD A549 cells (Figure S1B-E). Overexpression of TEX41 could downregulate E-cadherin expression and upregulate vimentin expression (Figure S1F), indicating that overexpression of TEX41 enhanced the metastatic ability of LUAD cells.

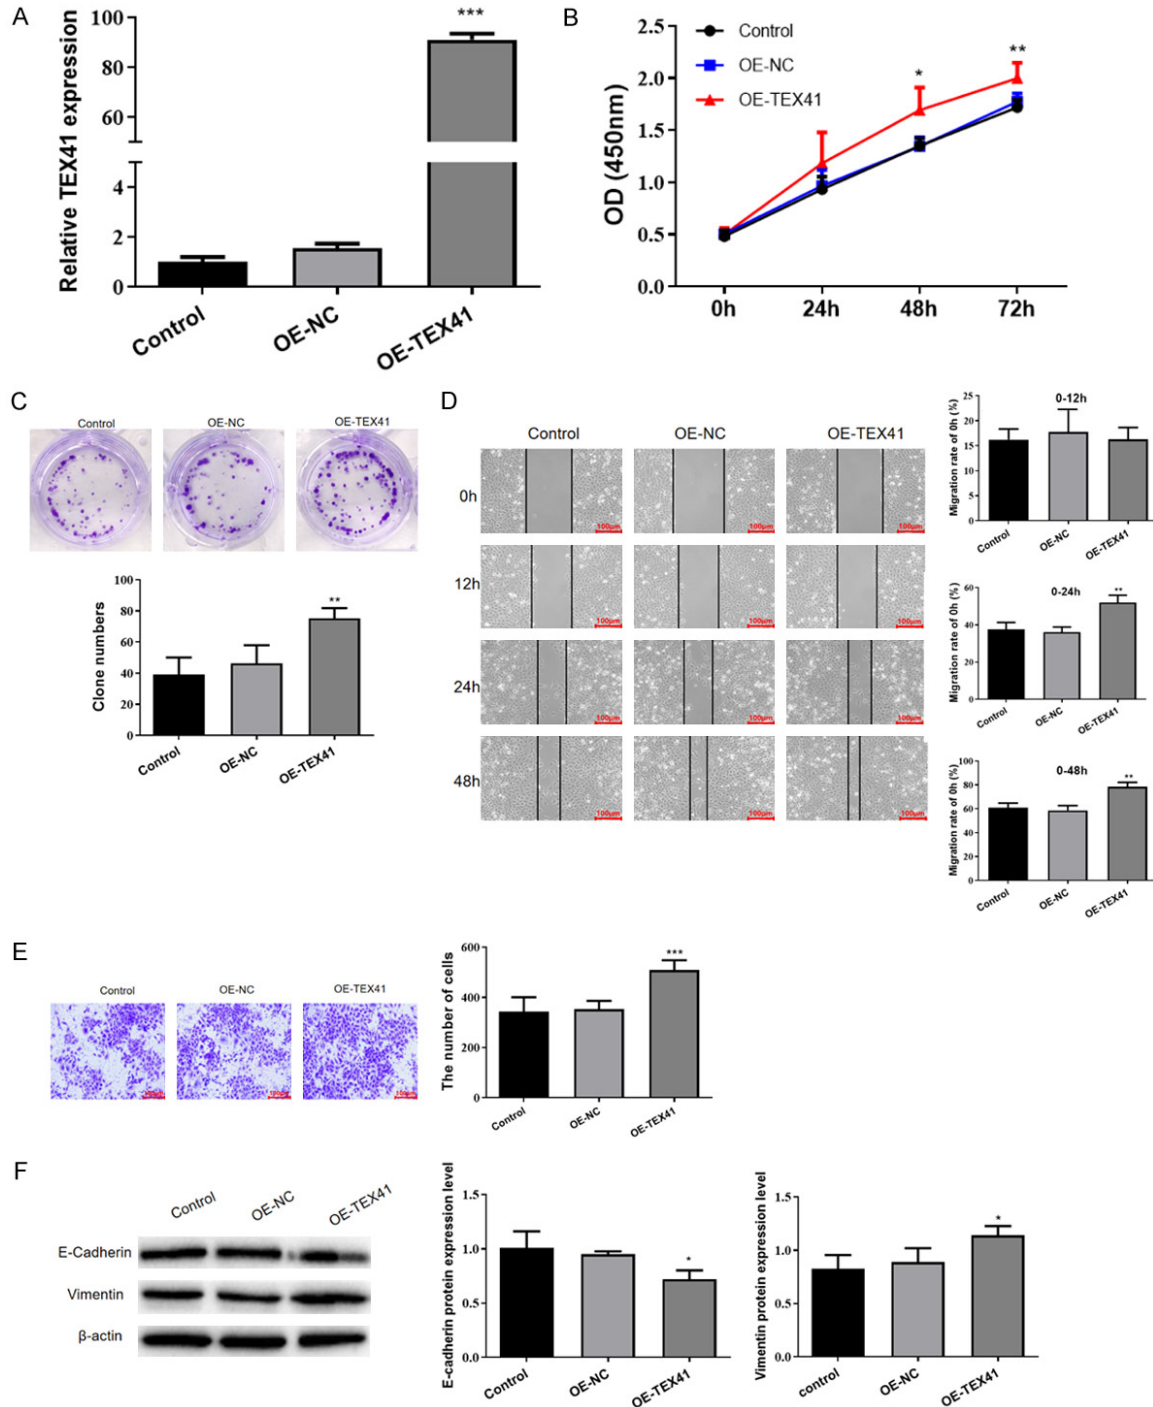

# LncRNA TEX41 regulates autophagy in LUAD

**Figure S1.** Overexpression of TEX41 promoted malignant biological behavior of lung adenocarcinoma (LUAD) cell. A. The expression of TEX41 in LUAD cell line introduced with OE-TEX41 or OE-NC was analyzed by qualitative polymerase chain reaction (qPCR). B. Cell Counting Kit-8 (CCK-8) assay suggested that overexpression of TEX41 promote proliferation of A549 cells. C. Overexpression of TEX41 promoted the independent proliferative ability of A549 cells by colony formation assays. D. Scratch assay showed that overexpression of TEX41 promoted the migration of A549 cells. E. Transwell assays were performed to indicate that overexpression of TEX41 promotes invasion of A549 cells. F. The levels of E-cadherin and vimentin protein after overexpression of TEX41 were determined by western blot. \* $P < 0.05$ , \*\* $P < 0.01$ , \*\*\* $P < 0.001$  vs. negative control (NC).

## TEX41 promoted the formation of subcutaneous tumors and bone metastasis of LUAD in nude mice

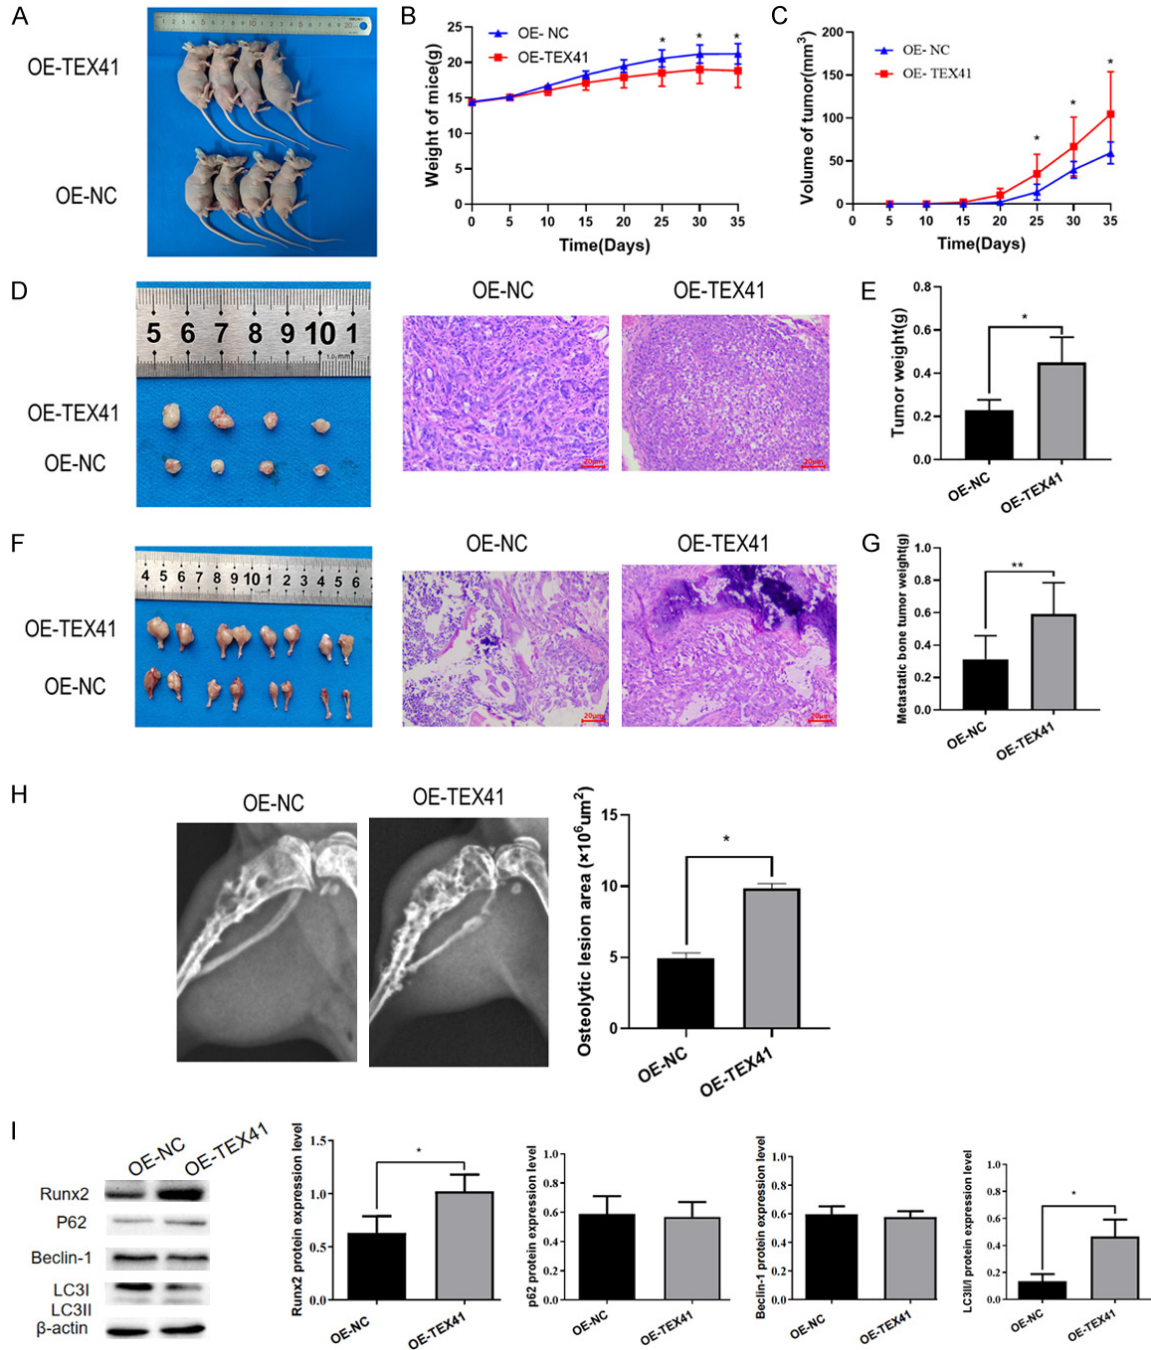

## LncRNA TEX41 regulates autophagy in LUAD

**Figure S2.** Overexpression of TEX41 promoted the formation of subcutaneous tumors and bone metastasis of lung adenocarcinoma (LUAD) in nude mice. A. Large specimens of nude mice. B. Body weight growth curve in nude mice. C. Subcutaneous tumor volume growth curve in nude mice. D. Hematoxylin and eosin (HE) staining of subcutaneous tumor sections from nude mice. E. Subcutaneous tumors weight. F. HE staining of BM sections from nude mice. G. BM tumors weight. H. BM areas measured by X-ray. I. Runx2 and autophagy marker protein levels in BM from nude mice were determined by immunoblotting. \* $P < 0.05$ , \*\* $P < 0.01$ , \*\*\* $P < 0.001$ .
